# Supplementary material for: The antioxidants resveratrol and N-acetylcysteine enhance anthelmintic activity of praziquantel and artesunate against Schistosoma mansoni
Source: PubMed Central journal article supplement (PMC6585032; doi:10.1186/s13071-019-3566-9), 2019-06-20

Additional File 1

**Figure S1** - Morphology of *S. mansoni* NTS after 96h incubation using different supplemented M199.

**Supplemented M199**

**7.5% NaHCO<sub>3</sub> , 5% FBS**

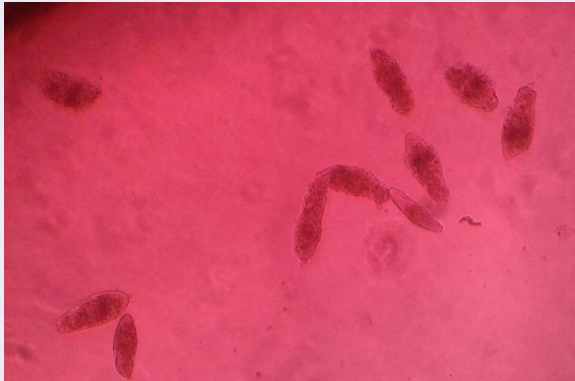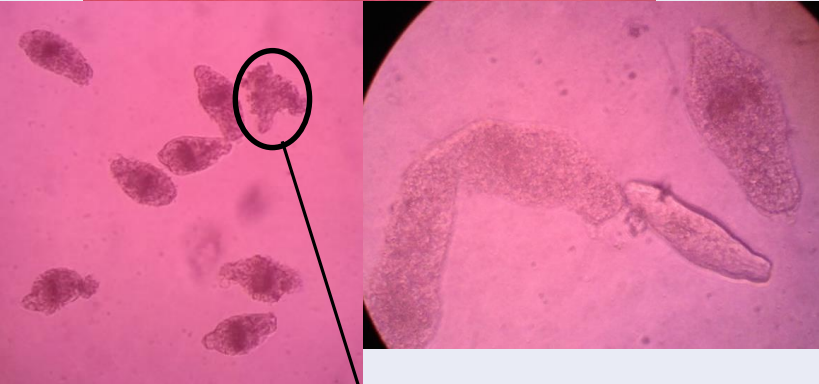

Cell lysis  
Several granularity

**20 mM HEPES, 10% FBS**

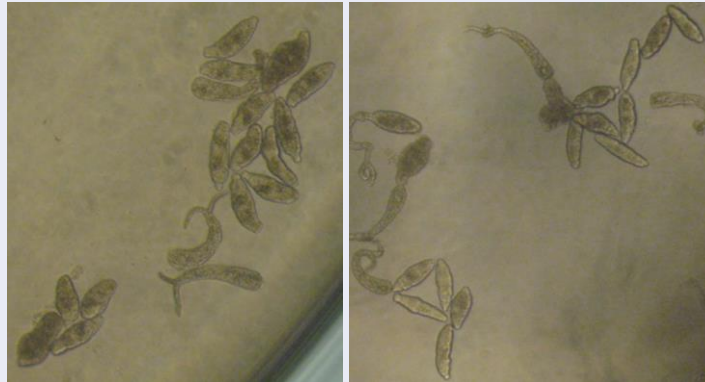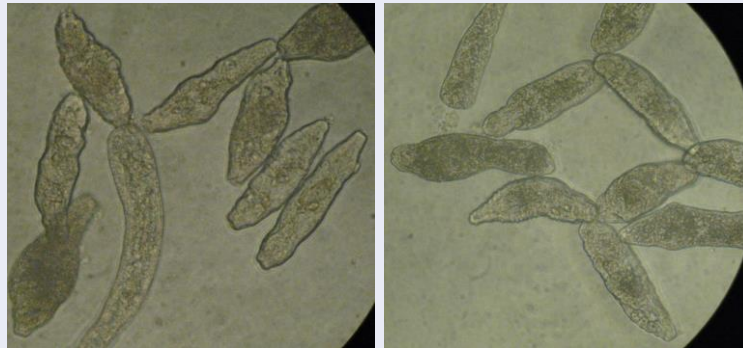

Best performance

**20 mM HEPES, 15% FBS**

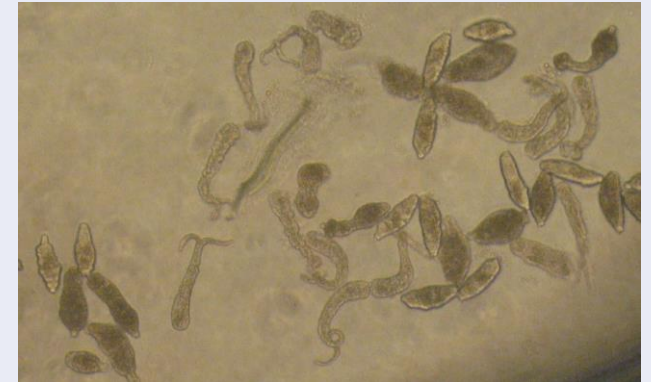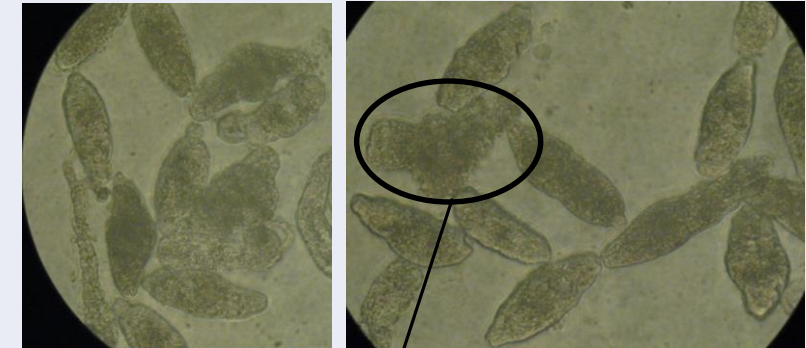

Cell lysis  
Several granularity

**Figure S2 - Viability score induced by drugs, antioxidants alone or combined.**

**Antihelminthic drugs vs AntiOx**

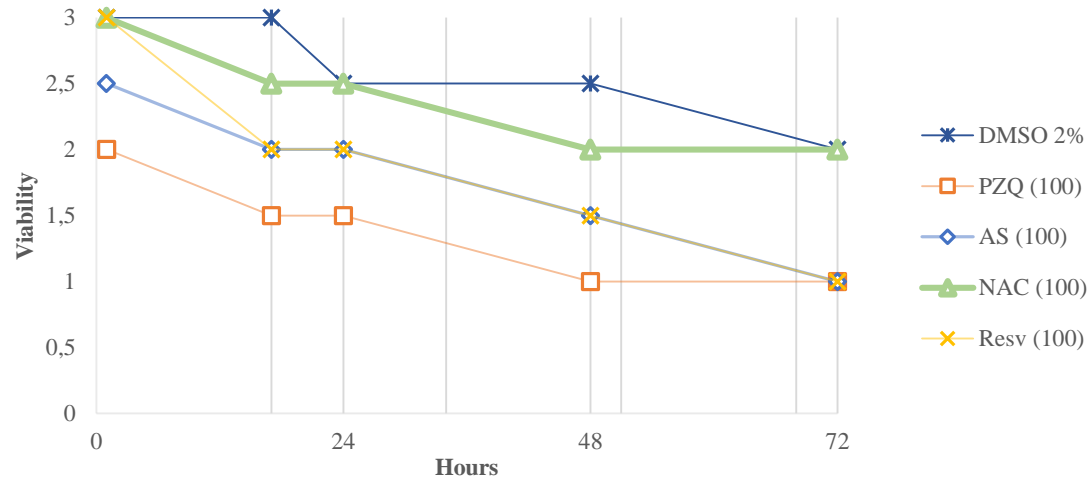

**PZQ + AntiOx**

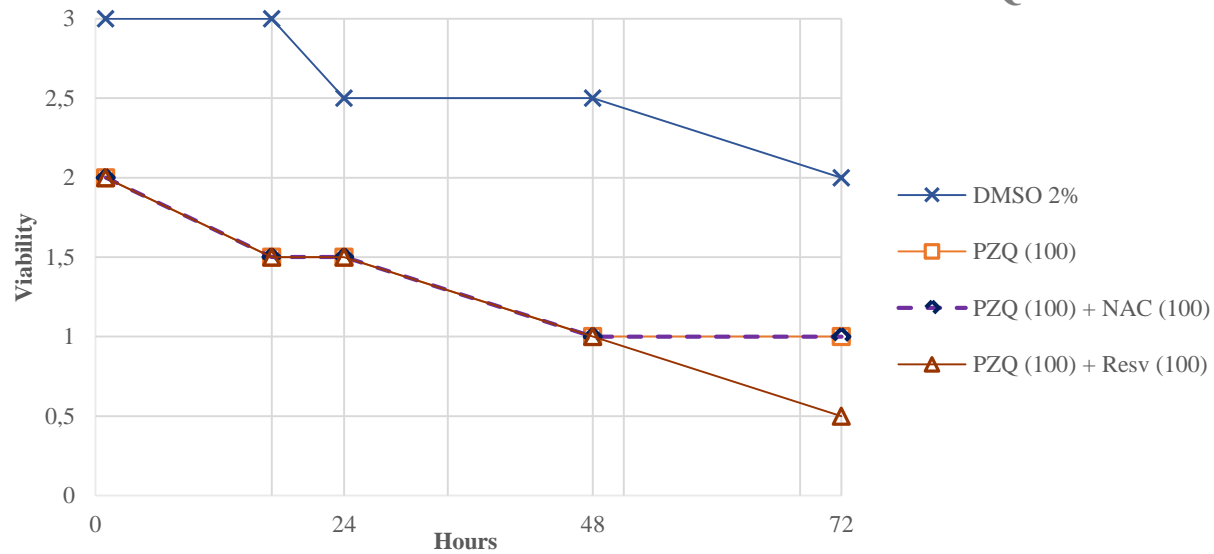

**AS + AntiOx**

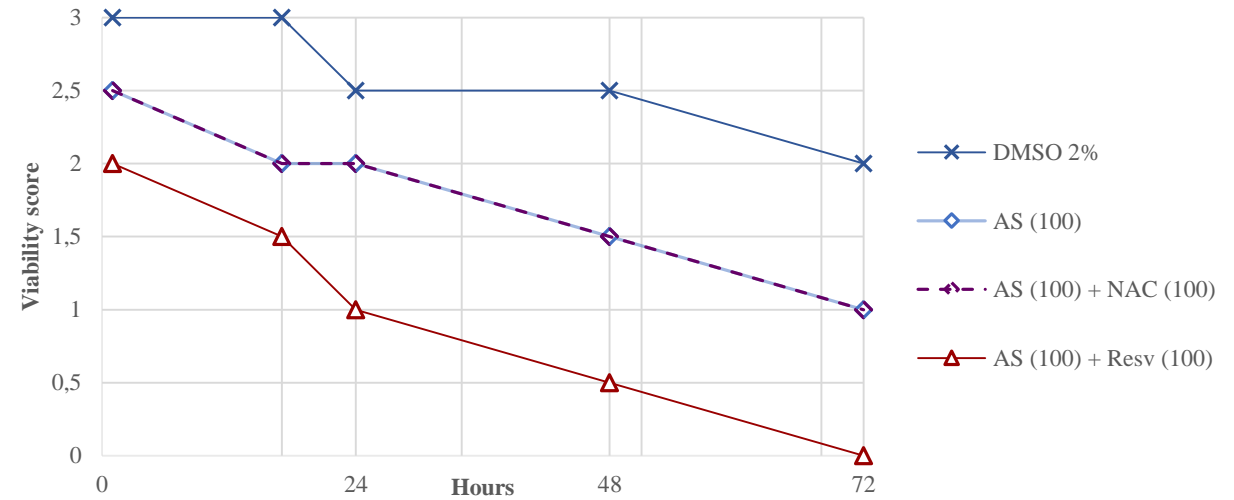

**Figure S3** – Morphological alterations induced by drugs (PZQ and AS), antioxidants (Resv and NAC) alone or combined.

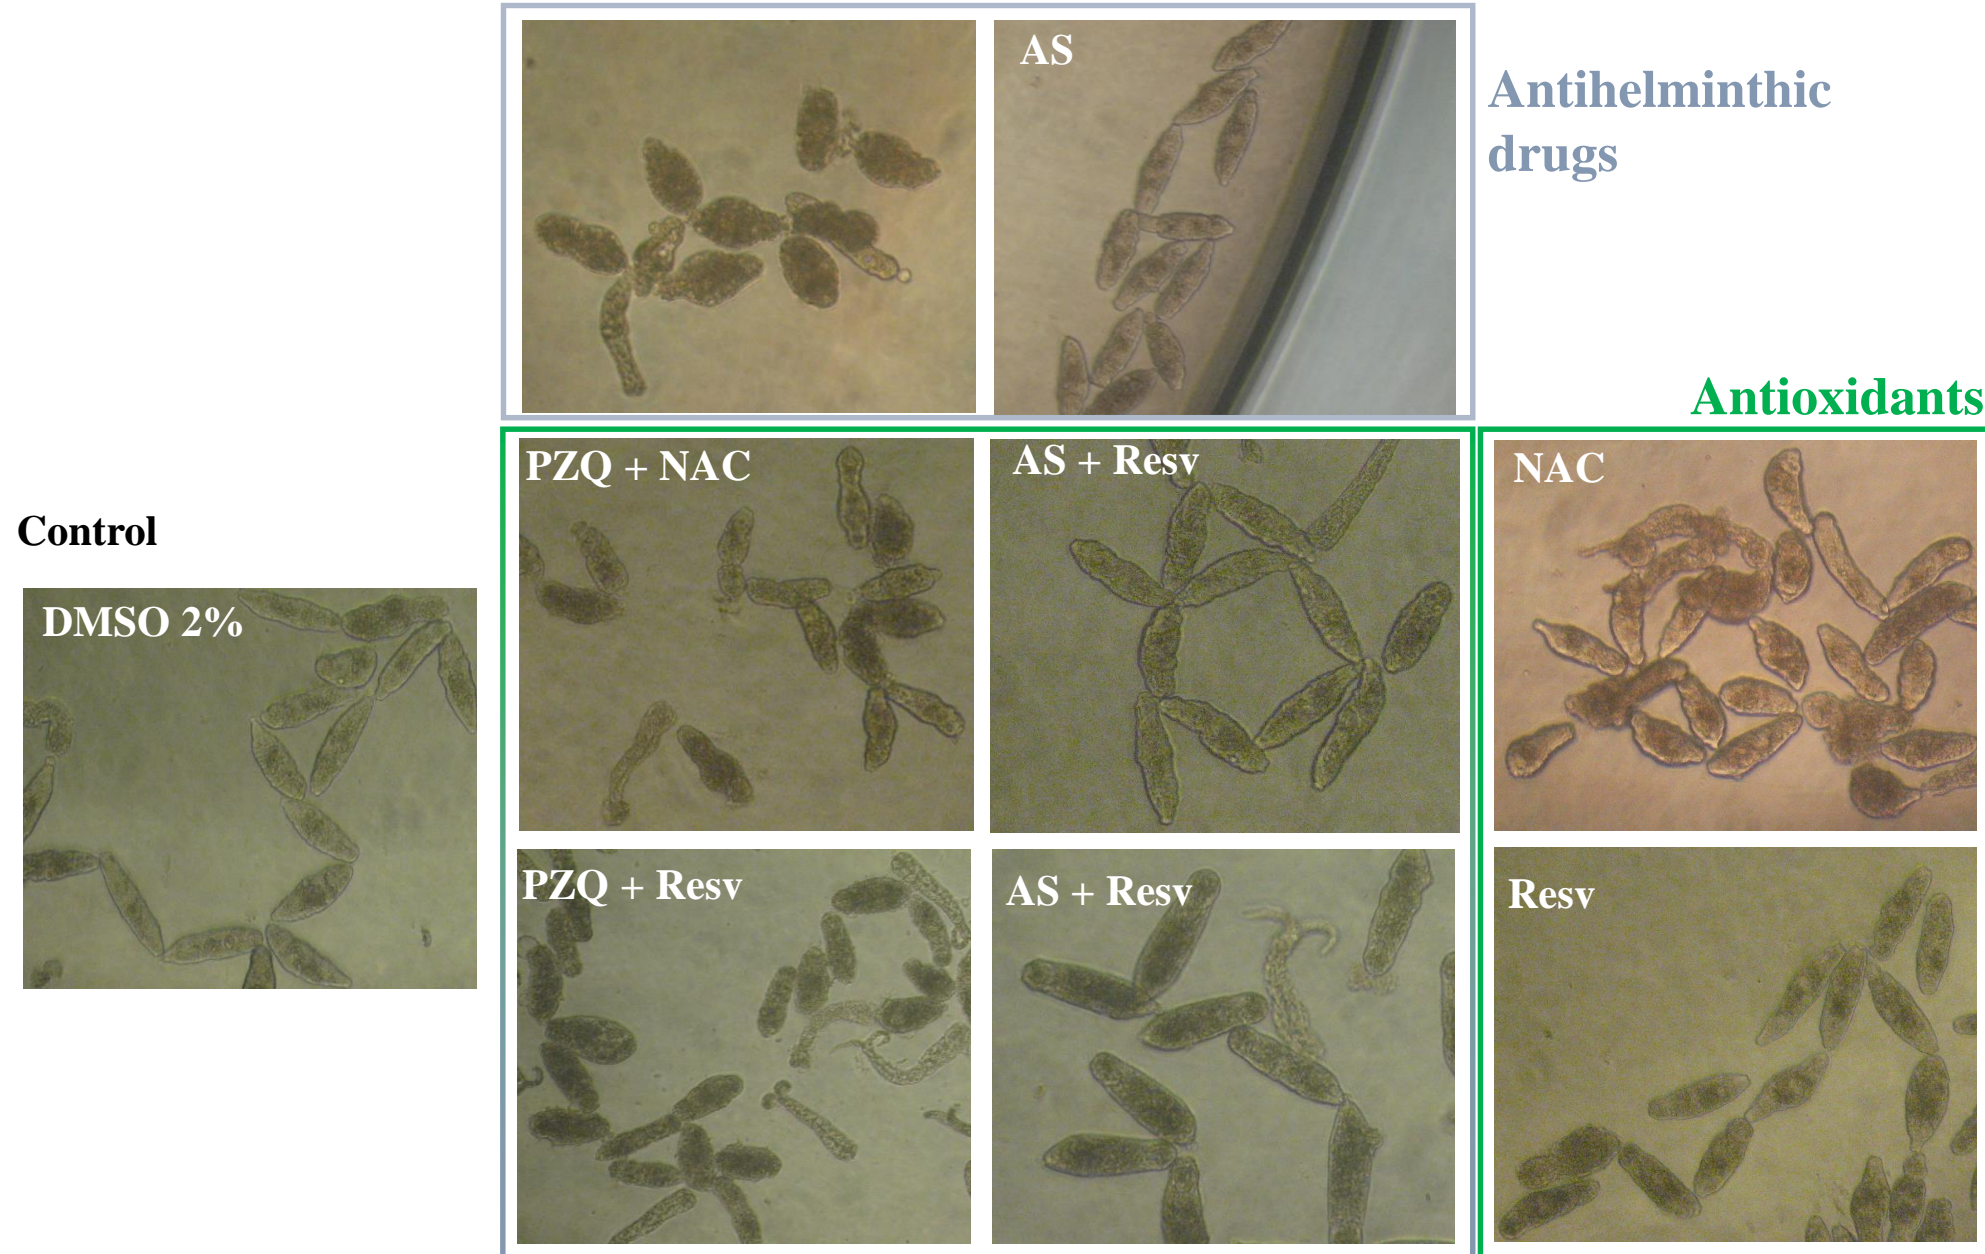

**Figure S4** - Morphological alterations observed at different concentrations of compounds.

|            | Control (0) | 10 $\mu$ M | 50 $\mu$ M | 100 $\mu$ M |
|------------|-------------|------------|------------|-------------|
| PZQ        |             |            |            |             |
| AS         |             |            |            |             |
| Resv       |             |            |            |             |
| PZQ + Resv |             |            |            |             |
| AS + Resv  |             |            |            |             |

**Figure S5** – Graphical of percentage of dead NTS induced by compounds evaluated at different concentrations.

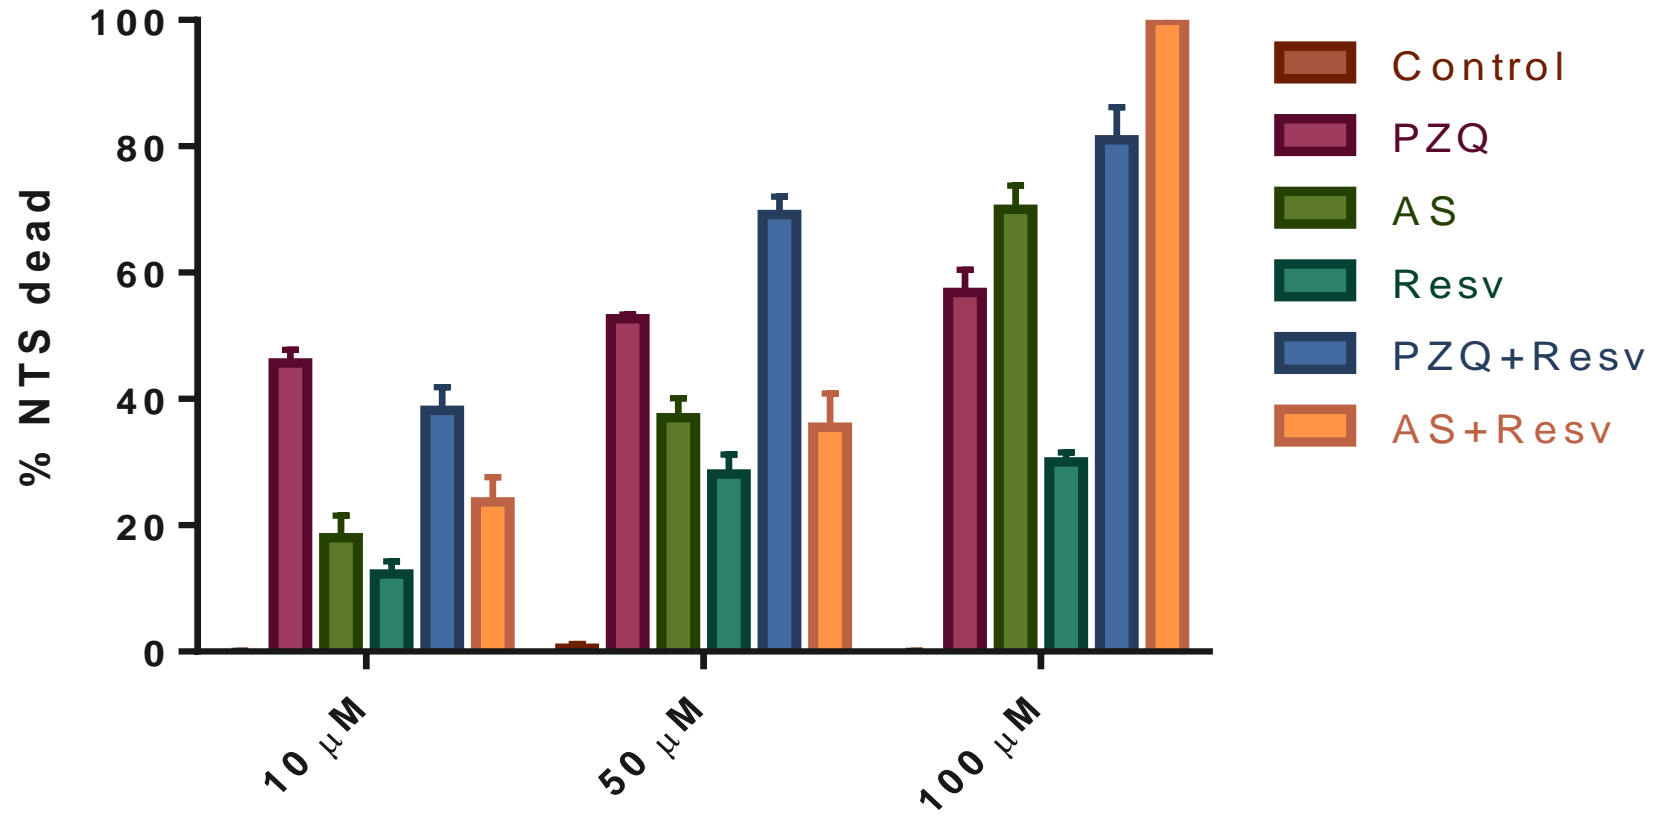

**Table S1:** Percentage of dead NTS induced by compounds alone and combination evaluated at 100  $\mu\text{M}$  and constant ratio 1:1. (N.D., not determinate)

|                        | Mean $\pm$ SD   |                |                |                |                |                |                  |                |                 |
|------------------------|-----------------|----------------|----------------|----------------|----------------|----------------|------------------|----------------|-----------------|
| [conc. $\mu\text{M}$ ] | Control         | PZQ            | AS             | RESV           | NAC            | PZQ+RESV       | PZQ+NAC          | AS+RESV        | AS+NAC          |
| 100                    | 1.38 $\pm$ 0.88 | 56.9 $\pm$ 2.5 | 70.0 $\pm$ 3.8 | 30.0 $\pm$ 1.6 | 7.8 $\pm$ N.D. | 81.0 $\pm$ 5.2 | 59.35 $\pm$ 26.4 | 99.9 $\pm$ 0.1 | 15.7 $\pm$ N.D. |

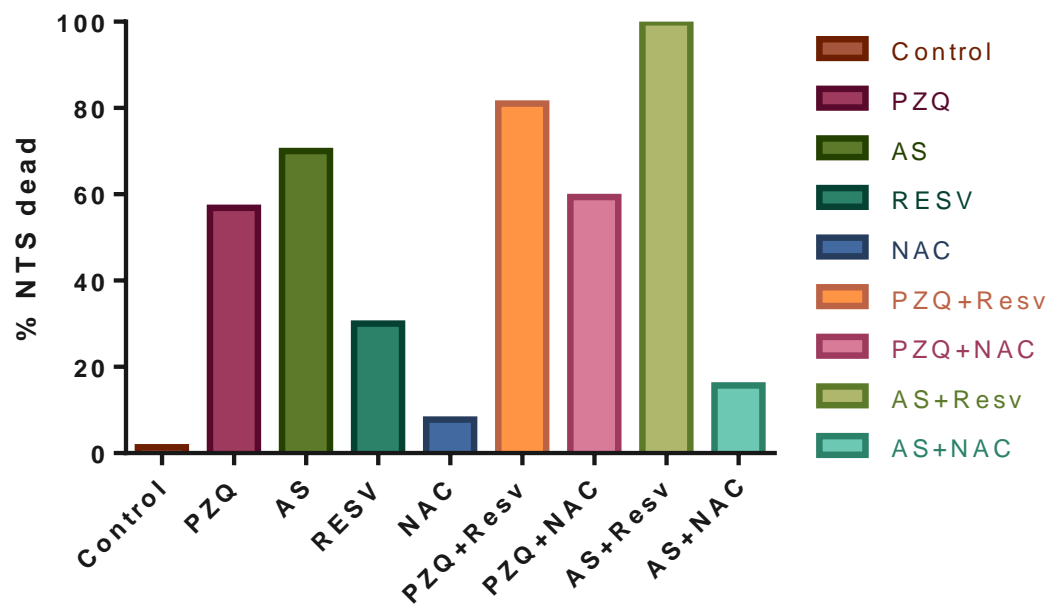

Supplement: 13071_2019_3566_MOESM1_ESM.pdf [file 13071_2019_3566_MOESM1_ESM.pdf]
